# Supplementary material for: Large electrocaloric effect with high thermal and electric field cycling stability in solution-processed Y:HfO2 thin films
Source: Royal Society of Chemistry journal article supplement (doi:10.1039/d1ta10229j), 2022-01-01
Supplement: d1ta10229j1.pdf [file d1ta10229j1.pdf]

## Supplementary information

### **Large electrocaloric effect with high thermal and electric field cycling stability in solution-processed Y:HfO<sub>2</sub> thin films**

*Shibnath Samanta<sup>a</sup>, Gopinathan Anoop<sup>\*a,b</sup>, WooJun Seol<sup>a</sup>, Seong Min Park<sup>a</sup>, HyunJin Joh<sup>a</sup>, Je Oh Choi<sup>a</sup>, Dante Ahn<sup>a</sup>, Sanjith Unithrattil<sup>a</sup>, Hoon Kim<sup>c</sup>, Jiwon Yeom<sup>c</sup>, Seungbum Hong<sup>c</sup>, and Ji Young Jo<sup>a</sup>*

<sup>a</sup>School of Materials Science and Engineering, Gwangju Institute of Science and Technology, Gwangju 61005, Republic of Korea

<sup>b</sup>Photosciences and Photonics Section, Chemical Sciences and Technology Division, Council of Scientific and Industrial Research–National Institute for Interdisciplinary Science and Technology (CSIR-NIIST), Thiruvananthapuram 695019, India.

<sup>c</sup>Department of Materials Science and Engineering, Korea Advanced Institute of Science and Technology, Daejeon 34141, Republic of Korea.

\*E-mail: [anoop@gist.ac.kr](mailto:anoop@gist.ac.kr)

Table S1: The references for the data plotted in the comparison in Figure 1 in the article.

| Code used       | Material                                                                                                        | T <sub>m</sub> (K) | ΔT (K) | Pb-free | Reference |
|-----------------|-----------------------------------------------------------------------------------------------------------------|--------------------|--------|---------|-----------|
| Single Crystals |                                                                                                                 |                    |        |         |           |
| BT              | BaTiO <sub>3</sub>                                                                                              | 288                | 1.33   | ✓       | [1]       |
| SBN             | Ce-Sr <sub>x</sub> Ba <sub>1-x</sub> Nb <sub>2</sub> O <sub>6</sub>                                             | 334                | 0.85   | ✓       | [2]       |
| BT              | BaTiO <sub>3</sub>                                                                                              | 402                | 0.9    | ✓       | [3]       |
| PMN-PT          | 0.7Pb(Mg <sub>1/3</sub> Nb <sub>2/3</sub> )O <sub>3</sub> -0.3PbTiO <sub>3</sub>                                | 403                | 2.7    | ×       | [4]       |
| BT              | BaTiO <sub>3</sub>                                                                                              | 283                | 1.4    | ✓       | [5]       |
| BT-BMT          | BaTiO <sub>3</sub> -Bi(Mg <sub>1/2</sub> Ti <sub>1/2</sub> )O <sub>3</sub>                                      | 416                | 1.21   | ✓       | [6]       |
| BHT             | BaHf <sub>0.1</sub> Ti <sub>0.89</sub> O <sub>3</sub>                                                           | 343                | 0.35   | ✓       | [7]       |
| PST             | Pb(Sc <sub>1/2</sub> Ta <sub>1/2</sub> )O <sub>3</sub>                                                          | 300                | 3.7    | ×       | [8]       |
| BST             | Ba <sub>0.65</sub> Sr <sub>0.35</sub> TiO <sub>3</sub>                                                          | 343                | 2.1    | ✓       | [9]       |
| PLZST           | Pb <sub>0.97</sub> La <sub>0.02</sub> (Zr <sub>0.80</sub> Sn <sub>0.14</sub> Ti <sub>0.06</sub> )O <sub>3</sub> | 313                | -12.9  | ×       | [10]      |
| PLZST           | Pb <sub>0.97</sub> La <sub>0.02</sub> (Zr <sub>0.80</sub> Sn <sub>0.14</sub> Ti <sub>0.06</sub> )O <sub>3</sub> | 323                | -14.1  | ×       | [10]      |
| BNT-BT          | 0.94(Bi <sub>0.5</sub> Na <sub>0.5</sub> )TiO <sub>3</sub> -0.06BaTiO <sub>3</sub>                              | 339                | 3.2    | ✓       | [11]      |
| PMN-PT          | 0.7[PbMg <sub>1/3</sub> Nb <sub>2/3</sub> O <sub>3</sub> ]-0.3[PbTiO <sub>3</sub> ]                             | 429                | 2.7    | ×       | [12]      |
| Thin films      |                                                                                                                 |                    |        |         |           |
| HYO(ECE1)       | Y-HfO <sub>2</sub>                                                                                              | 358                | 24.84  | ✓       | This work |
| HYO(ECE2)       | Y-HfO <sub>2</sub>                                                                                              | 358                | 24.35  | ✓       | This work |
| HYO(ECE3)       | Y-HfO <sub>2</sub>                                                                                              | 358                | 19.41  | ✓       | This work |
| PZT             | PbZr <sub>0.95</sub> Ti <sub>0.05</sub> O <sub>3</sub>                                                          | 495                | 12     | ×       | [13]      |
| PLZT(8/65/35)   | (Pb <sub>0.88</sub> La <sub>0.08</sub> )(Zr <sub>0.65</sub> Ti <sub>0.35</sub> )O <sub>3</sub>                  | 318                | 40     | ×       | [14]      |
| PBZ*            | Pb <sub>0.8</sub> Ba <sub>0.2</sub> ZrO <sub>3</sub>                                                            | 290                | 45.3   | ×       | [15]      |
| HSO             | Si-HfO <sub>2</sub>                                                                                             | 298                | 9.5    | ✓       | [16]      |
| HAO             | Al-HfO <sub>2</sub>                                                                                             | 295                | 5.7    | ✓       | [17]      |
| HGO             | Gd-HfO <sub>2</sub>                                                                                             | 295                | 3.1    | ✓       | [17]      |
| PMN-PT          | 0.65[PbMg <sub>1/3</sub> Nb <sub>2/3</sub> O <sub>3</sub> ]-0.35[PbTiO <sub>3</sub> ]                           | 413                | 31     | ×       | [18]      |
| PLZST           | Pb <sub>0.97</sub> La <sub>0.02</sub> (Zr <sub>0.75</sub> Sn <sub>0.2</sub> Ti <sub>0.07</sub> )O <sub>3</sub>  | 306                | 33     | ×       | [19]      |
| HZO             | Hf <sub>0.2</sub> Zr <sub>0.8</sub> O <sub>2</sub>                                                              | 298                | 13.4   | ✓       | [20]      |
| HZO             | Hf <sub>0.3</sub> Zr <sub>0.7</sub> O <sub>2</sub>                                                              | 448                | 8.9    | ✓       | [20]      |
| Polymers        |                                                                                                                 |                    |        |         |           |
| P(VDF-TrFE-CFE) | P(VDF-TrFE-CFE)                                                                                                 | 303                | 15     | ✓       | [21]      |
| P(VDF-TrFE)     | P(0.55VDF-0.45TrFE)                                                                                             | 353                | 12.6   | ✓       | [22]      |
| P(VDF-TrFE)     | P(0.7VDF-0.3TrFE)                                                                                               | 390                | 21.2   | ✓       | [23]      |
| P(VDF-TrFE-CFE) | P(0.562VDF-0.363TrFE-0.076CFE)                                                                                  | 350                | 21.6   | ✓       | [23]      |
| Special form    |                                                                                                                 |                    |        |         |           |
| Cascade         | P(VDF-TrFE-CFE)                                                                                                 | 300                | 8.7    | ✓       | [24]      |
| Nanocubes       | P(VDF-TrFE-CFE)/ Ba <sub>0.67</sub> Sr <sub>0.33</sub> TiO <sub>3</sub>                                         | 316                | 9.1    | ✓       | [25]      |
| Nanowire        | P(VDF-TrFE-CFE)/ Ba <sub>0.67</sub> Sr <sub>0.33</sub> TiO <sub>3</sub>                                         | 300                | 32     | ✓       | [25]      |
| Molecular       | Cyclohexylmethylammonium bromide                                                                                | 364                | 4.2    | ✓       | [26]      |

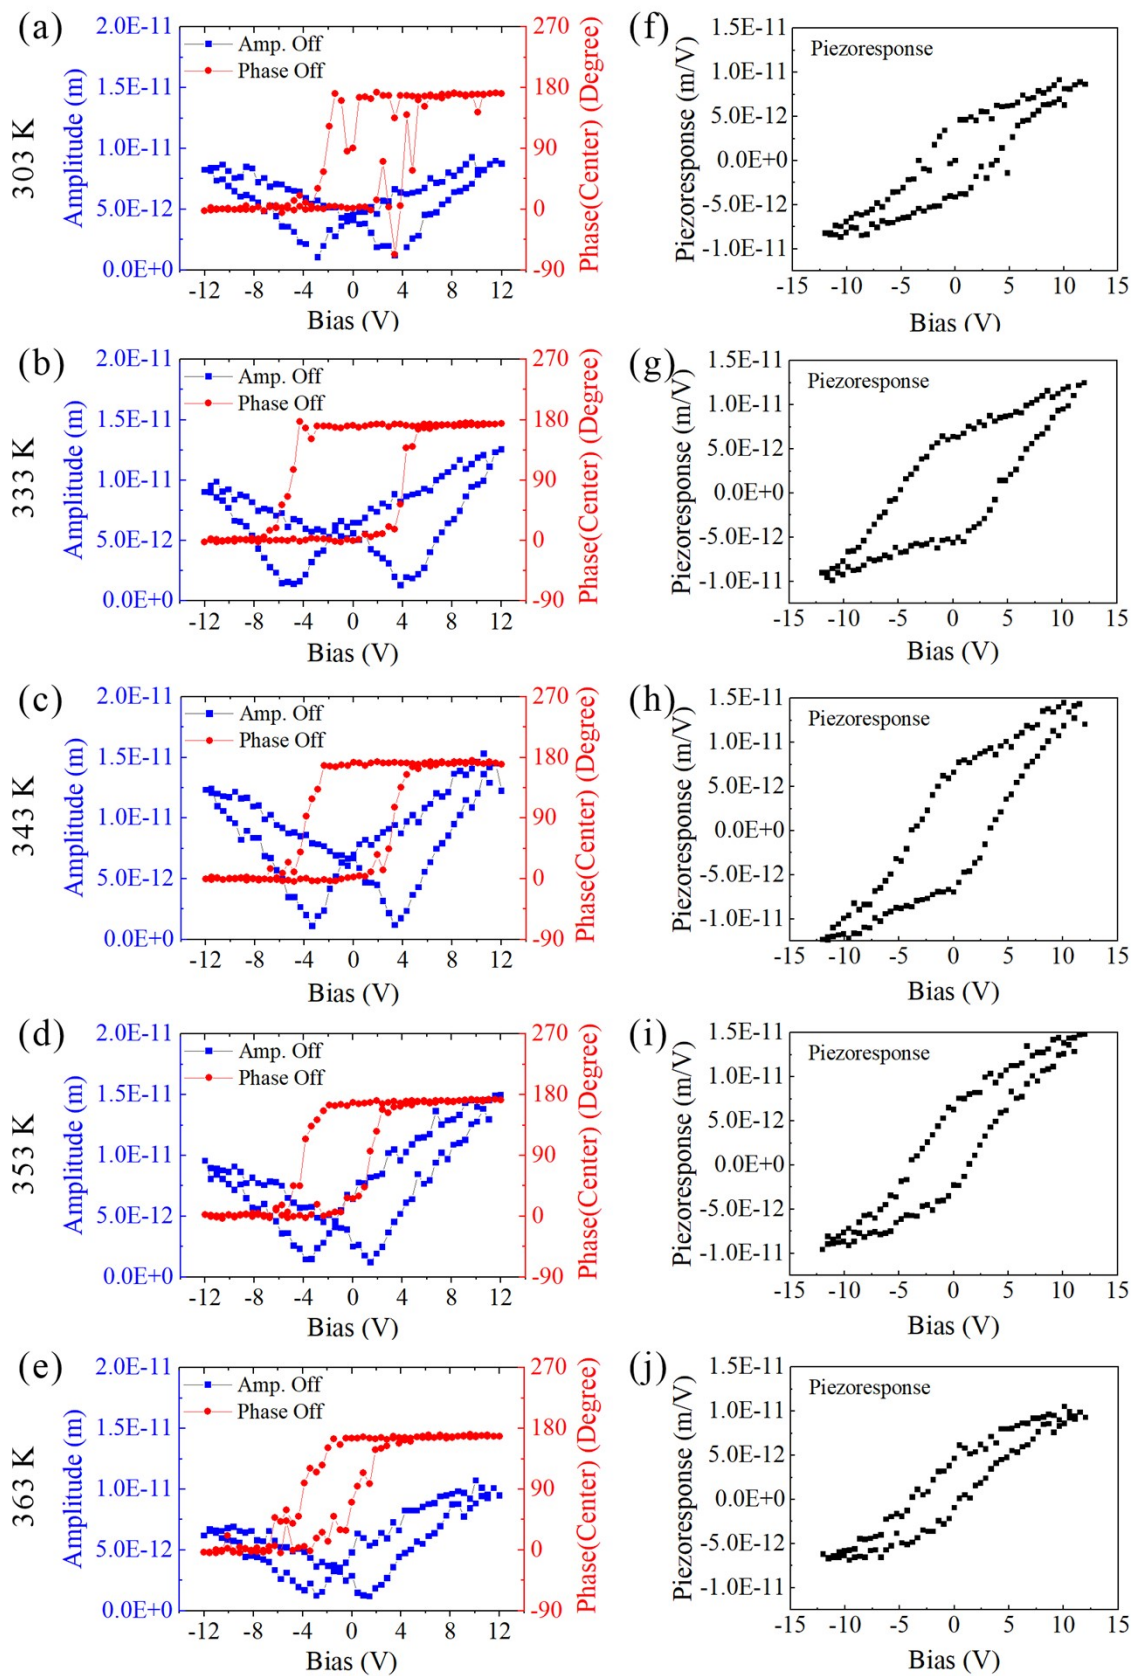

Figure S1: (a)-(e) PFM local hysteresis at temperature 303, 333, 343, 353 and 363 K. (f)-(j) Local piezo-response at those specified temperatures.

## References

1. Li, J., et al., *Near-Room-Temperature Large Electrocaloric Effect in Barium Titanate Single Crystal Based on the Electric Field–Temperature Phase Diagram*. *physica status solidi (RRL) – Rapid Research Letters*, 2021. **15**(8).
2. Le Goupil, F., et al., *Effect of Ce doping on the electrocaloric effect of  $Sr_xBa_{1-x}Nb_2O_6$  single crystals*. *Applied Physics Letters*, 2014. **104**(22).222911.
3. Moya, X., et al., *Giant electrocaloric strength in single-crystal  $BaTiO_3$* . *Adv Mater*, 2013. **25**(9).1360-5.
4. Chukka, R., et al., *Enhanced cooling capacities of ferroelectric materials at morphotropic phase boundaries*. *Applied Physics Letters*, 2011. **98**(24).242902.
5. Bai, Y., et al., *The electrocaloric effect around the orthorhombic- tetragonal first-order phase transition in  $BaTiO_3$* . *AIP Advances*, 2012. **2**(2).022162.
6. Li, M.-D., et al., *Giant electrocaloric effect in  $BaTiO_3$ – $Bi(Mg_{1/2}Ti_{1/2})O_3$  lead-free ferroelectric ceramics*. *Journal of Alloys and Compounds*, 2018. **747**.1053-1061.
7. Li, J., et al., *Large room-temperature electrocaloric effect in lead-free  $BaHf_xTi_{1-x}O_3$  ceramics under low electric field*. *Acta Materialia*, 2016. **115**.58-67.
8. Nouchokgwe, Y., et al., *Giant electrocaloric materials energy efficiency in highly ordered lead scandium tantalate*. *Nat Commun*, 2021. **12**(1).3298.
9. Liu, X.Q., et al., *Enhanced Electrocaloric Effects in Spark Plasma-Sintered  $Ba_{0.65}Sr_{0.35}TiO_3$ -Based Ceramics at Room Temperature*. *Journal of the American Ceramic Society*, 2013. **96**(4).1021-1023.
10. Zhuo, F., et al., *Giant Negative Electrocaloric Effect in  $(Pb,La)(Zr,Sn,Ti)O_3$  Antiferroelectrics Near Room Temperature*. *ACS Appl Mater Interfaces*, 2018. **10**(14).11747-11755.
11. Zhang, L., et al., *Electrocaloric refrigeration capacity in BNT-based ferroelectrics benefiting from low depolarization temperature and high breakdown electric field*. *Journal of Materials Chemistry A*, 2021. **9**(21).12772-12781.
12. Rožič, B., et al., *Influence of the critical point on the electrocaloric response of relaxor ferroelectrics*. *Journal of Applied Physics*, 2011. **110**(6).
13. Mischenko, A.S., et al., *Giant electrocaloric effect in thin-film  $PbZr_{0.95}Ti_{0.05}O_3$* . *Science*, 2006. **311**(5765).1270-1.
14. Lu, S.G., et al., *Organic and inorganic relaxor ferroelectrics with giant electrocaloric effect*. *Applied Physics Letters*, 2010. **97**(16).162904.
15. Peng, B., H. Fan, and Q. Zhang, *A Giant Electrocaloric Effect in Nanoscale Antiferroelectric and Ferroelectric Phases Coexisting in a Relaxor  $Pb_{0.8}Ba_{0.2}ZrO_3$  Thin Film at Room Temperature*. *Advanced Functional Materials*, 2013. **23**(23).2987-2992.
16. Hoffmann, M., et al., *Ferroelectric phase transitions in nanoscale  $HfO_2$  films enable giant pyroelectric energy conversion and highly efficient supercapacitors*. *Nano Energy*, 2015. **18**.154-164.

17. Park, M.H., et al., *Effect of acceptor doping on phase transitions of HfO<sub>2</sub> thin films for energy-related applications*. Nano Energy, 2017. **36**.381-389.
18. Saranya, D., et al., *Electrocaloric effect of PMN-PT thin films near morphotropic phase boundary*. Bulletin of Materials Science, 2009. **32**(3).259-262.
19. Hao, X., Y. Zhao, and Q. Zhang, *Phase Structure Tuned Electrocaloric Effect and Pyroelectric Energy Harvesting Performance of (Pb<sub>0.97</sub>La<sub>0.02</sub>)(Zr,Sn,Ti)O<sub>3</sub> Antiferroelectric Thick Films*. The Journal of Physical Chemistry C, 2015. **119**(33).18877-18885.
20. Park, M.H., et al., *Toward a multifunctional monolithic device based on pyroelectricity and the electrocaloric effect of thin antiferroelectric Hf<sub>x</sub>Zr<sub>1-x</sub>O<sub>2</sub> films*. Nano Energy, 2015. **12**.131-140.
21. Li, X., et al., *Tunable temperature dependence of electrocaloric effect in ferroelectric relaxor poly(vinylidene fluoride-trifluoroethylene-chlorofluoroethylene terpolymer)*. Applied Physics Letters, 2011. **99**(5).052907.
22. Neese, B., et al., *Large electrocaloric effect in ferroelectric polymers near room temperature*. Science, 2008. **321**(5890).821-3.
23. Liu, P.F., et al., *Huge electrocaloric effect in Langmuir-Blodgett ferroelectric polymer thin films*. New Journal of Physics, 2010. **12**(2).023035.
24. Meng, Y., et al., *A cascade electrocaloric cooling device for large temperature lift*. Nature Energy, 2020. **5**(12).996-1002.
25. Zhang, G., et al., *Colossal Room-Temperature Electrocaloric Effect in Ferroelectric Polymer Nanocomposites Using Nanostructured Barium Strontium Titanates*. ACS Nano, 2015. **9**(7).7164-74.
26. Xu, H., et al., *A Metal-Free Molecular Antiferroelectric Material Showing High Phase Transition Temperatures and Large Electrocaloric Effects*. J Am Chem Soc, 2021. **143**(35).14379-14385.
